# Supplementary material for: Novel α-Amylase Inhibitor Hemi-Pyocyanin Produced by Microbial Conversion of Chitinous Discards
Source: MDPI journal article supplement (doi:10.3390/md20050283), 2022-04-23
Supplement: s1 [file s1]

## Supplementary materials:

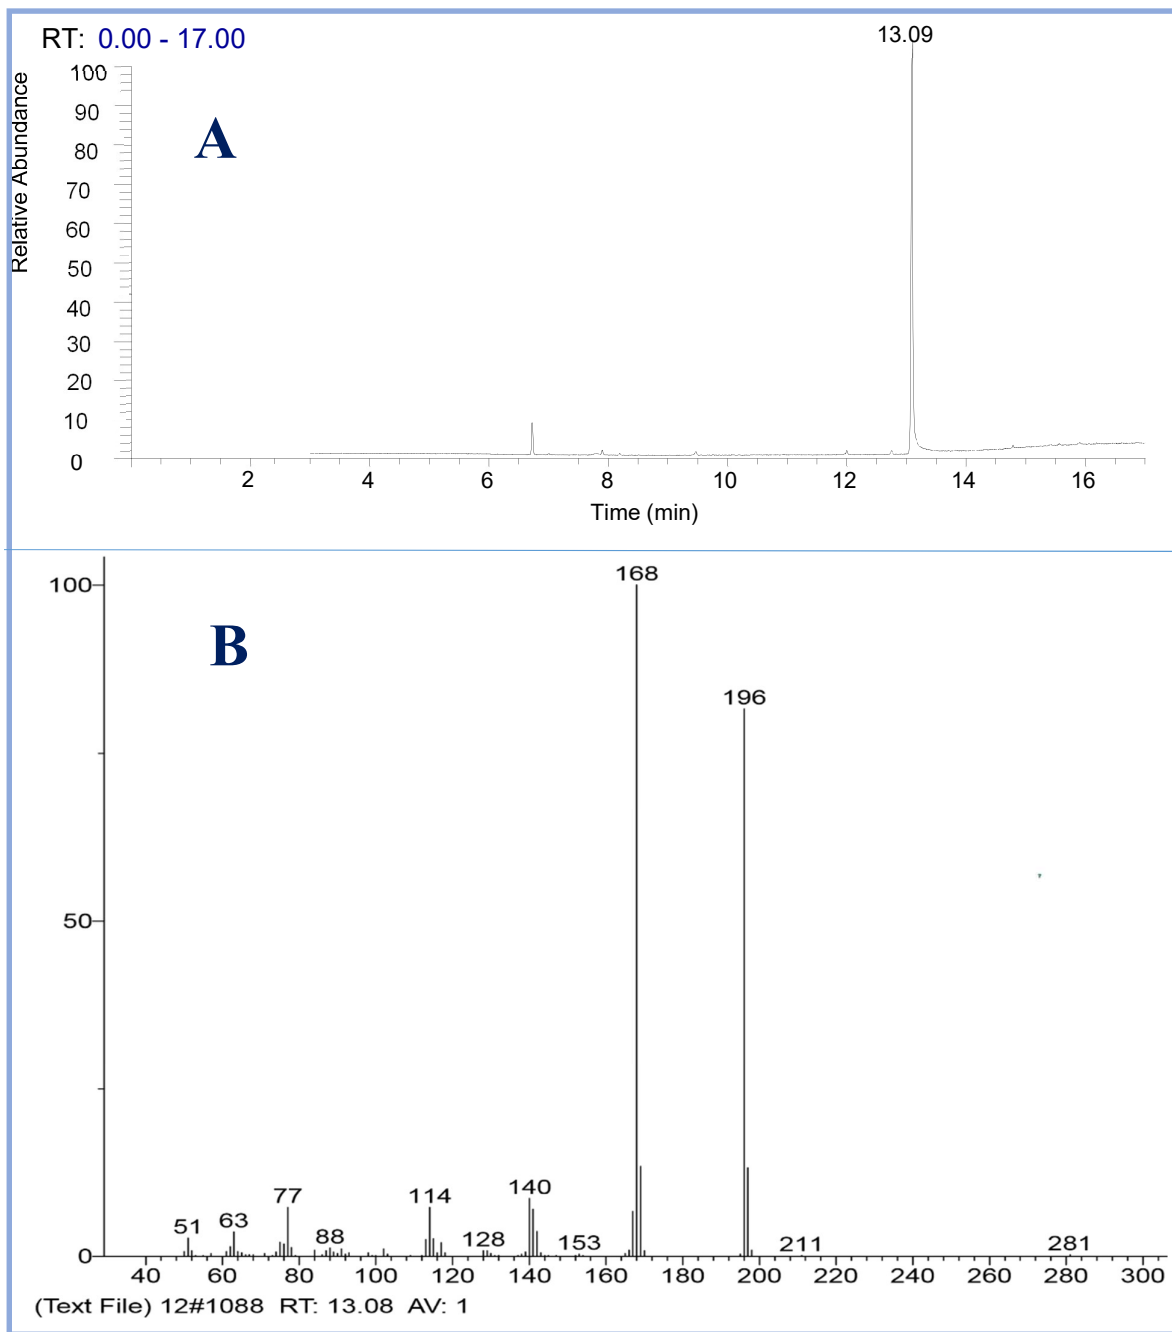

**Figure S1.** The gas chromatography-mass spectrometry (GCMS) profile of purified compound SF-1. The GC profile (A) and MS profile (B).

<sup>1</sup>H of SF-1

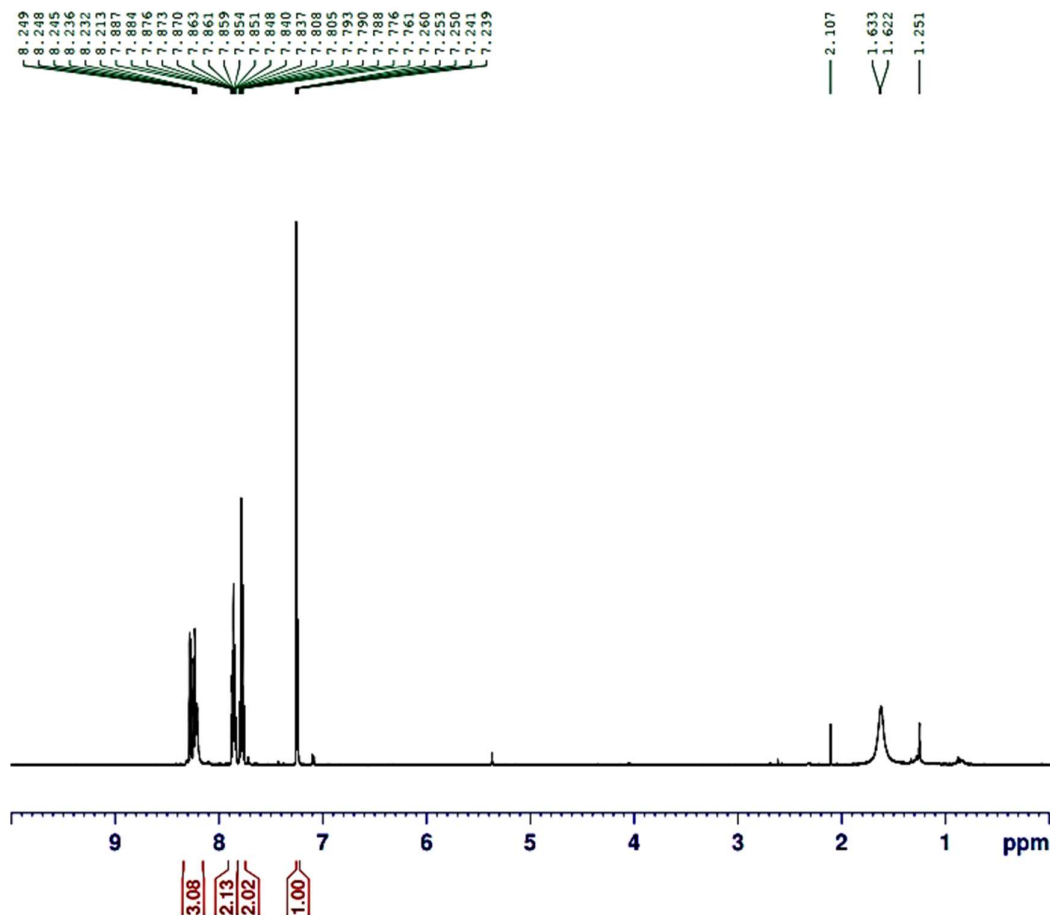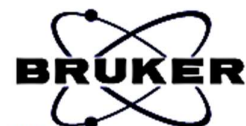

NAME SF-1  
 EXPNO 1  
 PROCNO 1  
 Date\_ 20220307  
 Time 11.21  
 INSTRUM spect  
 PROBHD 5 mm PABBO BB-  
 PULPROG zg30  
 TD 32768  
 SOLVENT CDCl3  
 NS 16  
 DS 0  
 SWH 7183.908 Hz  
 FIDRES 0.219235 Hz  
 AQ 2.2807724 sec  
 RG 10300  
 DW 69.600 usec  
 DE 6.00 usec  
 TE 299.0 K  
 D1 2.00000000 sec  
 TDO 1

===== CHANNEL f1 =====  
 NUC1 1H  
 P1 15.00 usec  
 PL1 -0.80 dB  
 PL1W 24.15961456 W  
 SFO1 600.1330006 MHz  
 SI 32768  
 SF 600.1300107 MHz  
 WDW no  
 SSB 0  
 LB 0.00 Hz  
 GB 0  
 PC 1.00

Figure S2. <sup>1</sup>H NMR spectrum of compound SF-1, measured in CDCl<sub>3</sub> at 600 MHz.

<sup>13</sup>C of SF-1

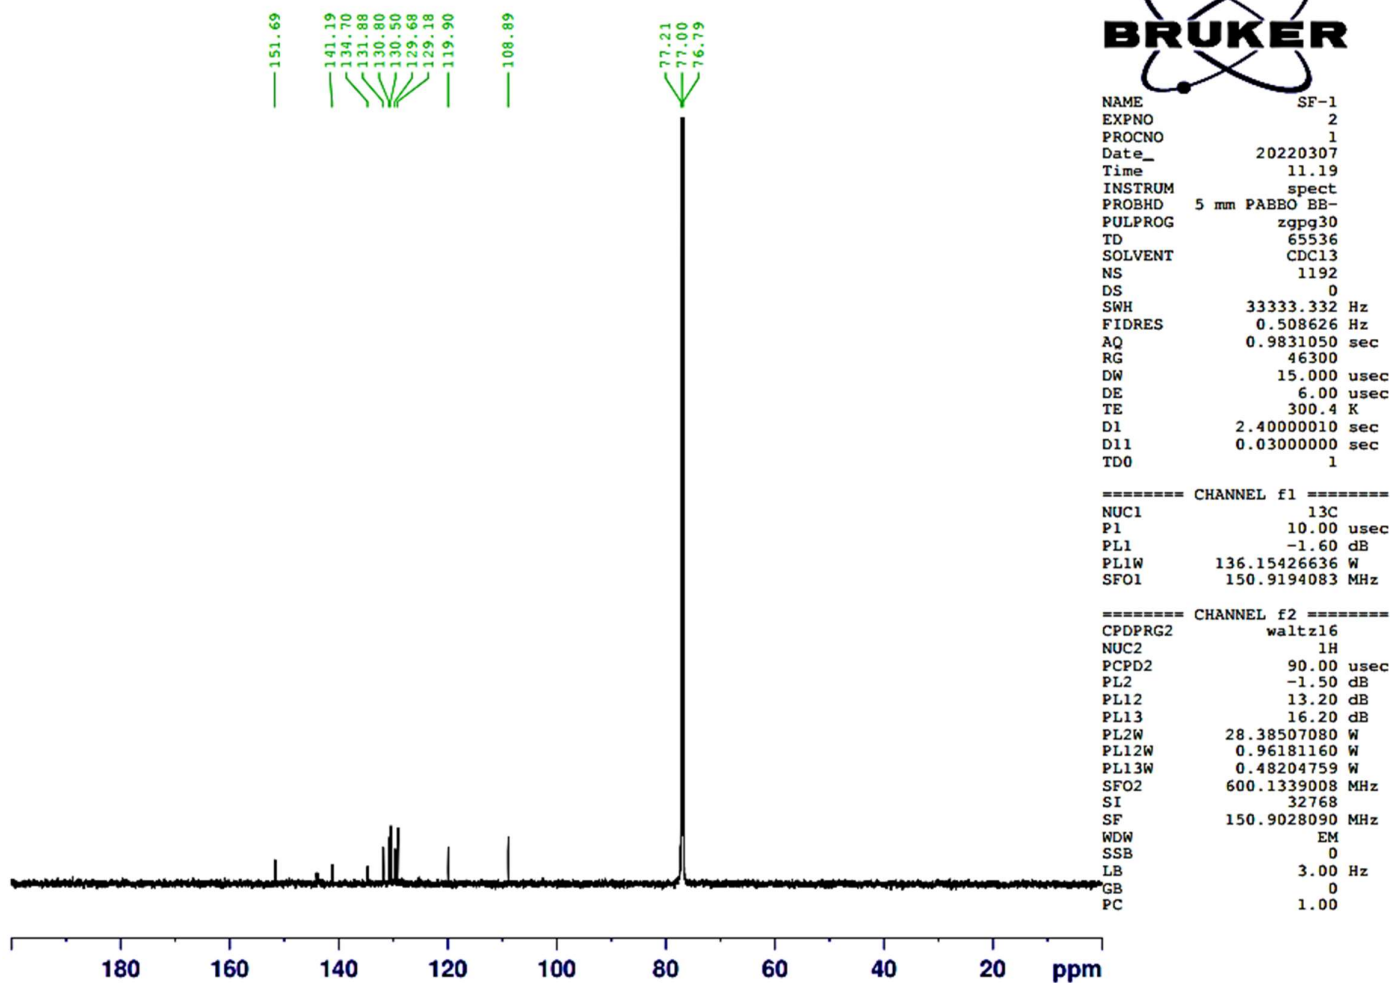

**Figure S3.** <sup>13</sup>C NMR spectrum of compound SF-1, measured in CDCl<sub>3</sub> at 151 MHz.

DEPT135 of SF-1

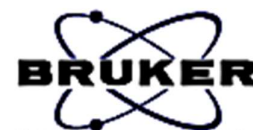

```

NAME          SF-1
EXPNO         13
PROCNO        1
Date_         20220307
Time          13.41
INSTRUM       spect
PROBHD        5 mm PABBO BB-
PULPROG       dept135
TD            65536
SOLVENT       CDCl3
NS            769
DS            8
SWH           33333.332 Hz
FIDRES        0.508626 Hz
AQ            0.9831050 sec
RG            46300
DW            15.000 usec
DE            6.00 usec
TE            300.0 K
CNST2         145.00000000
D1            2.000000000 sec
D2            0.00344828 sec
D12           0.00002000 sec
TD0           1
  
```

```

===== CHANNEL f1 =====
NUC1          13C
P1            10.00 usec
P2            20.00 usec
PL1           -1.60 dB
PL1W          136.15426636 W
SFO1          150.9194083 MHz
  
```

```

===== CHANNEL f2 =====
CPDPRG2       waltz16
NUC2          1H
P3            15.00 usec
P4            30.00 usec
PCPD2         90.00 usec
PL2           -1.50 dB
PL12          13.20 dB
PL2W          28.38507080 W
PL12W         0.96181160 W
SFO2          600.1346700 MHz
SI            32768
SF            150.9028090 MHz
WDW           EM
SSB           0
LB            3.00 Hz
GB            0
PC            1.00
  
```

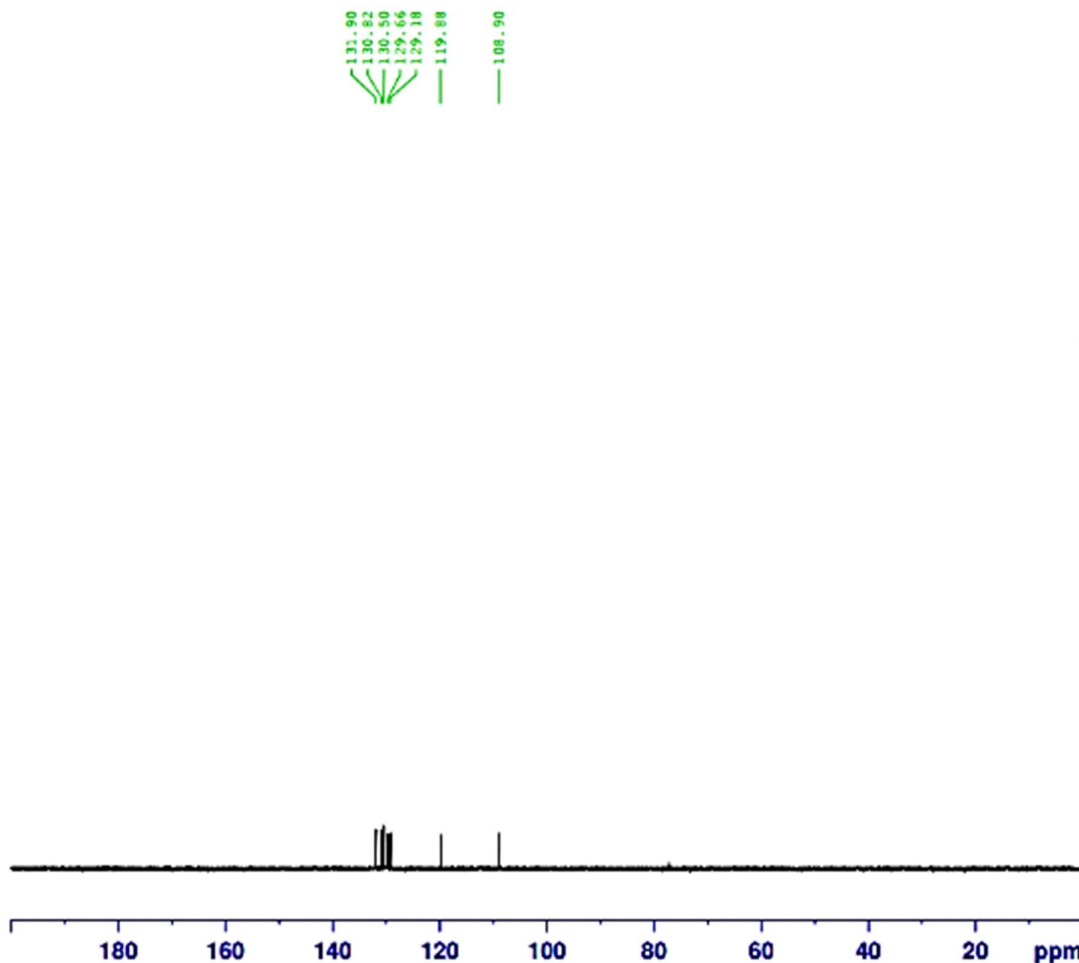

Figure S4. DEPT 135 spectrum of compound SF-1, measured in CDCl<sub>3</sub> at 151 MHz.

DEPT90 of SF-1

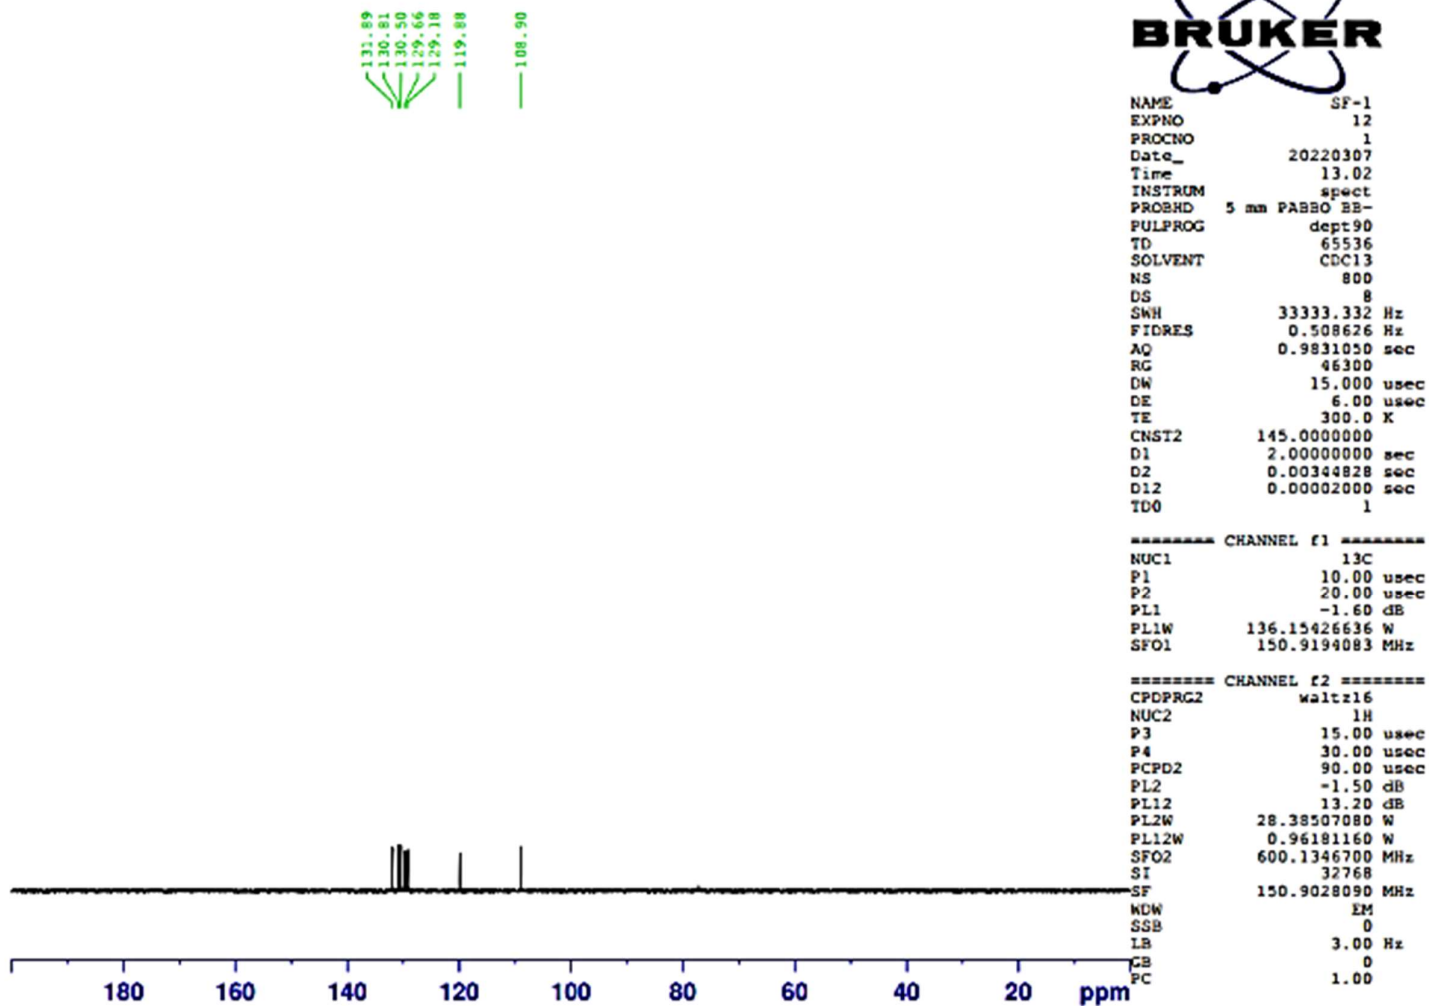

Figure S5. DEPT 90 spectrum of compound SF-1, measured in CDCl<sub>3</sub> at 151 MHz.

DEPT45 of SF-1

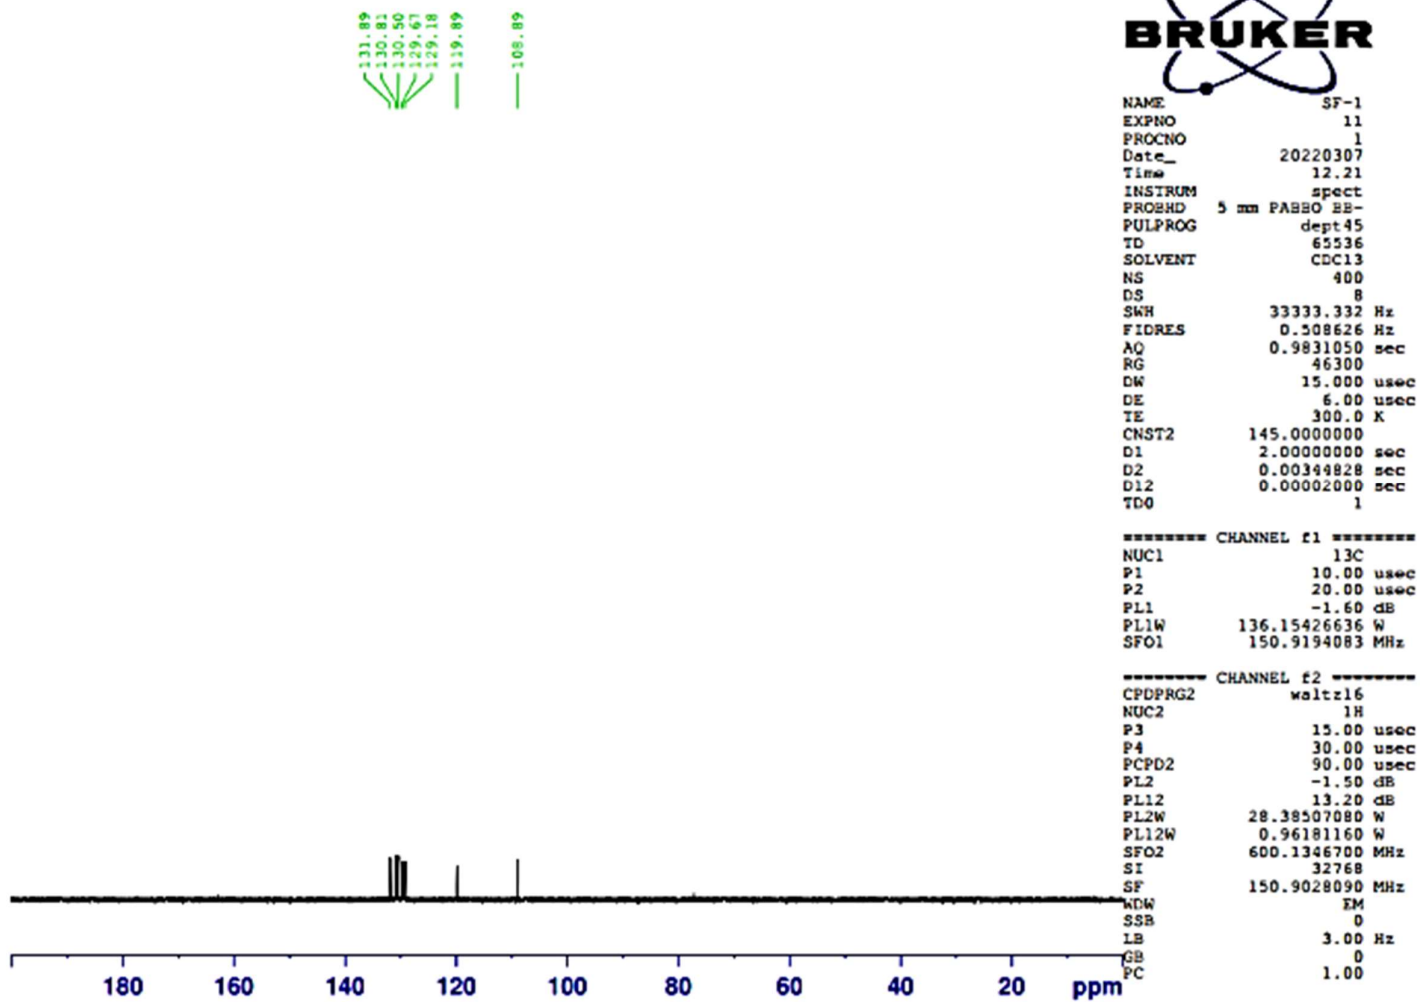

Figure S6. DEPT 45 spectrum of compound SF-1, measured in CDCl<sub>3</sub> at 151 MHz.
